# Supplementary material for: The synthesis of thiol-stabilized silver nanoparticles and their application towards the nanomolar-level colorimetric recognition of glutathione
Source: Royal Society of Chemistry journal article supplement (doi:10.1039/c9nj01360a), 2019-01-01
Supplement: c9nj01360a1.pdf [file c9nj01360a1.pdf]

**Manuscript ID NJ-ART-03-2019-001360.R4**

**Synthesis of a thiol stabilized silver nanoparticle and its application towards nanomolar level colorimetric recognition of glutathione**

Mt Nasima Aktara, Sk Nayim, Nandan Kumar Sahoo, Maidul Hossain\*

Department of Chemistry and Chemical Technology, Vidyasagar University, Midnapore 721 102, West Bengal, India.

AUTHOR INFORMATION: Corresponding Author: Dr. Maidul Hossain, Department of Chemistry & Chemical Technology, Vidyasagar University, Midnapore 721 102, West Bengal, India.\* (M.H.) E-mail: [hossainm@mail.vidyasagar.ac.in](mailto:hossainm@mail.vidyasagar.ac.in)/ [maidulhossain@yahoo.com](mailto:maidulhossain@yahoo.com)

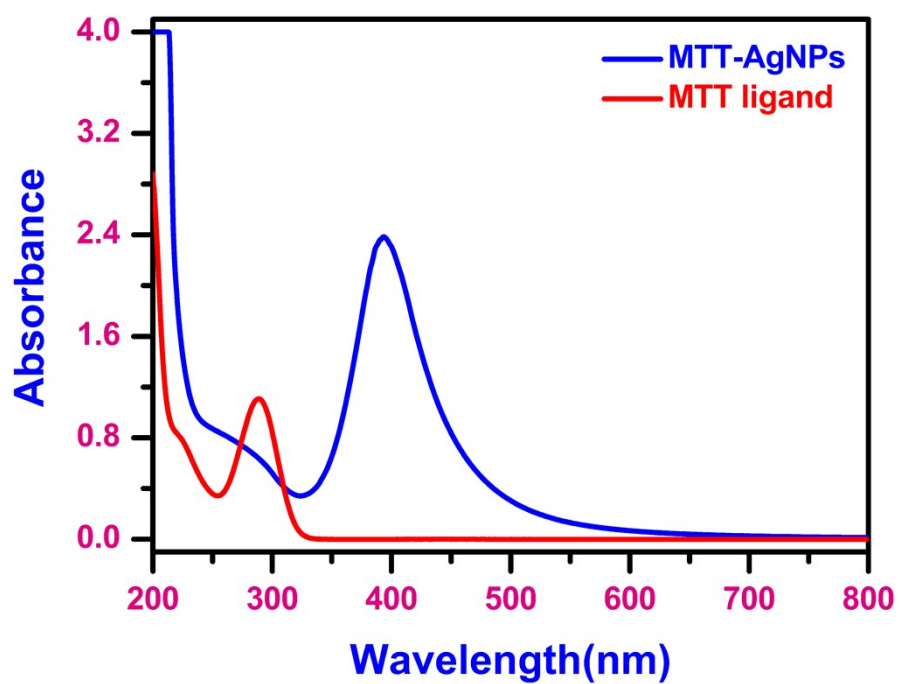

**Fig. S1** UV-Visible spectra of MTT ligand (Red) and MTT-AgNPs (Blue)

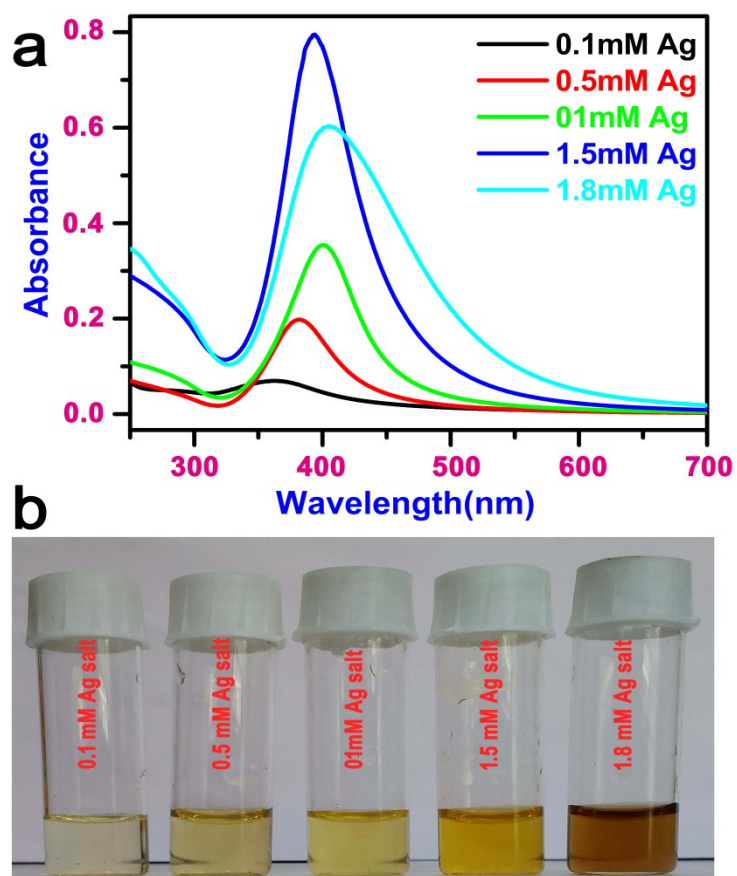

**Fig. S2** (a) UV-Visible spectra of MTT-AgNPs at different conc. of metal salt and (b) their corresponding images

**Table S1**

| AgNPs conc. depending on diff silver salt conc. |                        |            |                  |
|-------------------------------------------------|------------------------|------------|------------------|
| Sample                                          | Silver salt conc. (mM) | Abs. Value | AgNPs conc. (nM) |
| S1                                              | 0.1                    | 0.07       | 1.13             |
| S2                                              | 0.5                    | 0.2        | 3.22             |
| S3                                              | 0.1                    | 0.353      | 5.69             |
| S4                                              | 1.5                    | 0.79       | 12.74            |
| S5                                              | 1.8                    | 0.6        | 9.67             |

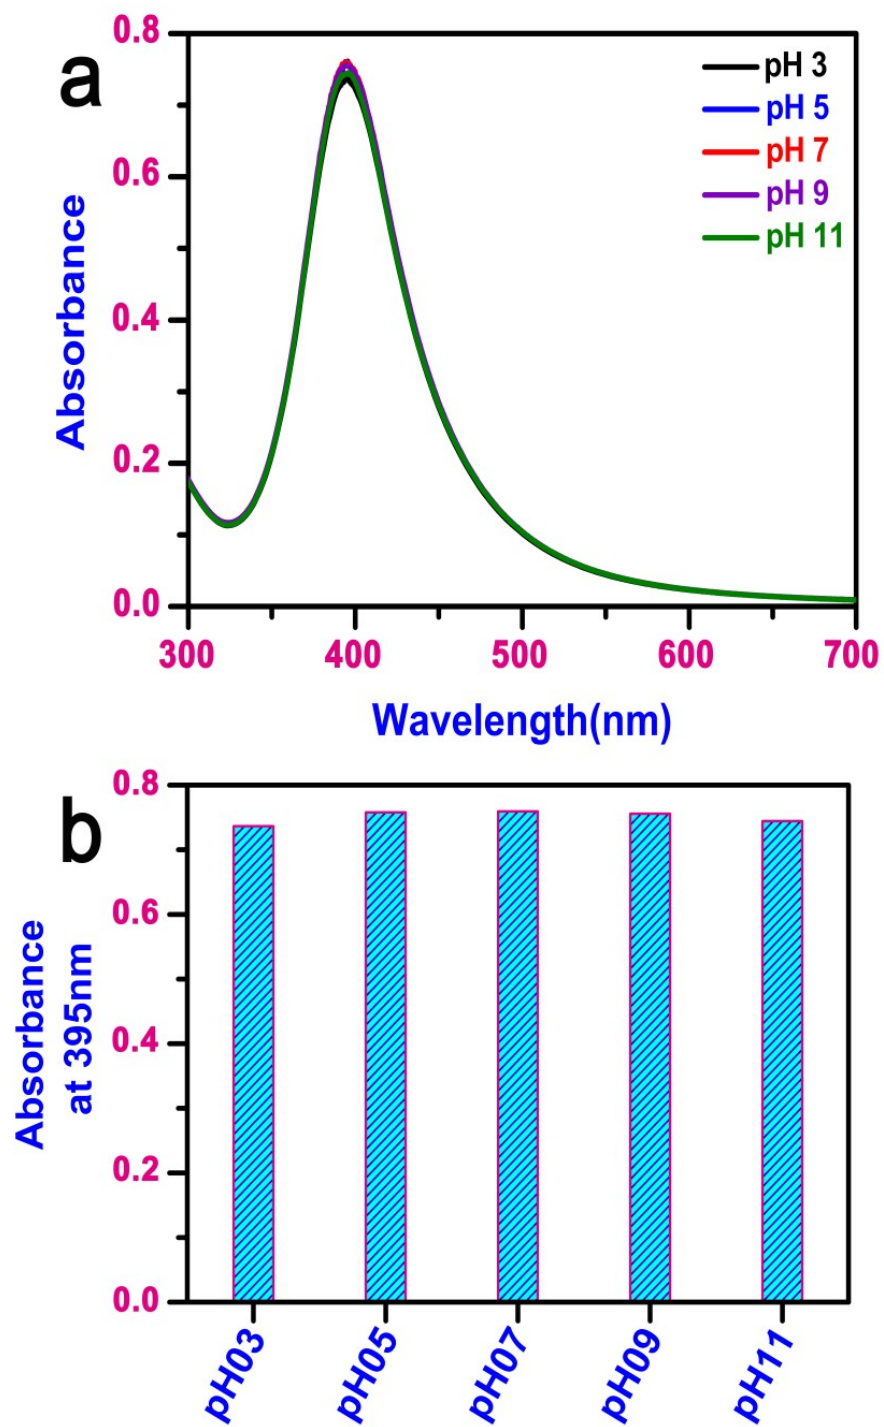

**Fig. S3** (a) UV-Visible spectra of MTT-AgNPs at different pH and (b) their corresponding bar diagram representation.

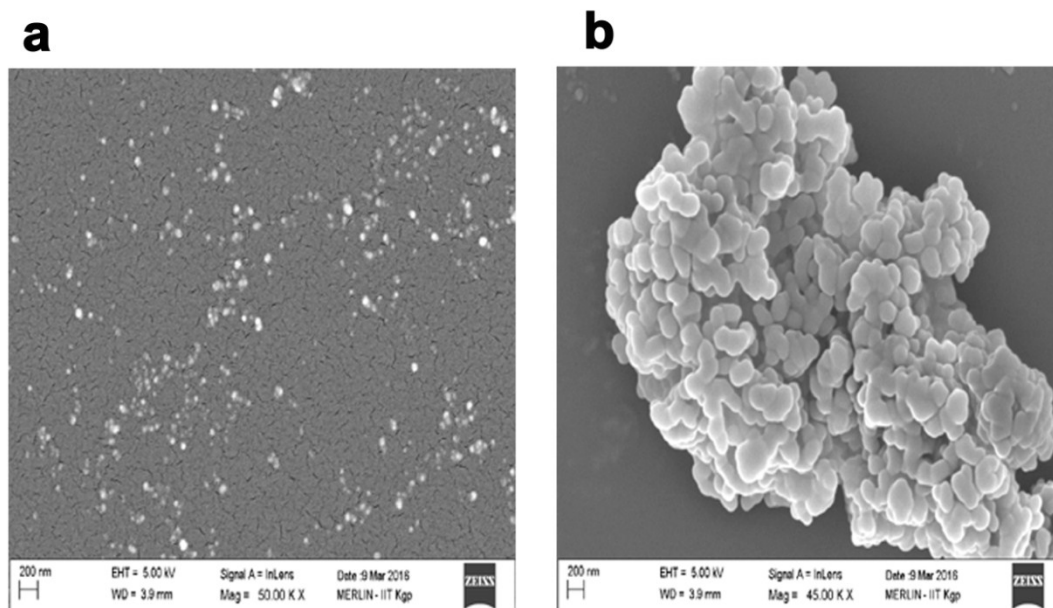

**Fig. S4** FE-SEM images of (a) MTT-AgNPs and (b) MTT-AgNPs in presence of glutathione

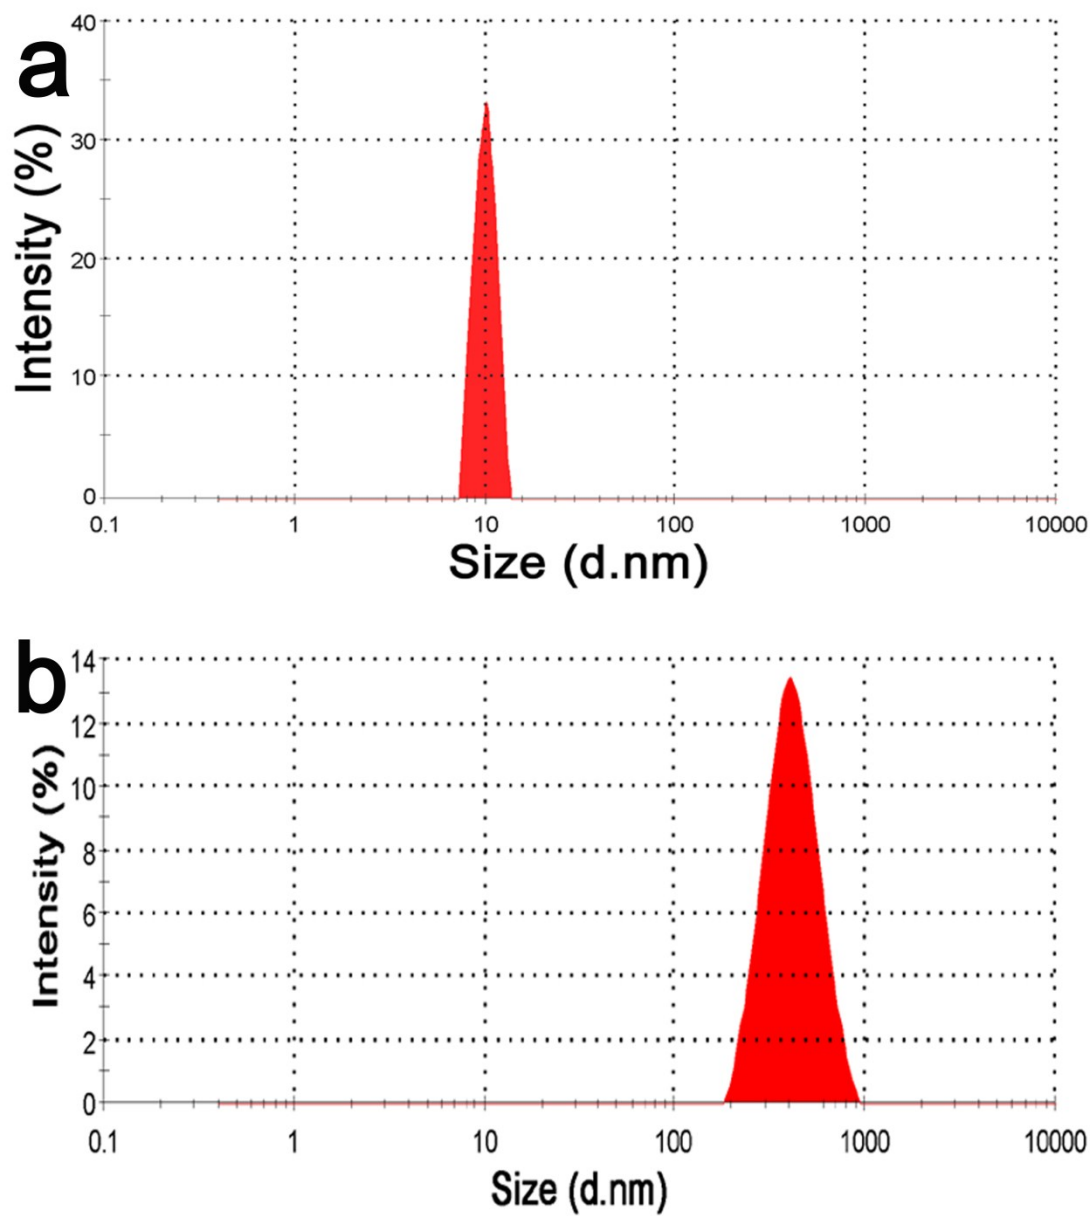

**Fig. S5** DLS spectra of (a) MTT-AgNPs and (b) MTT-AgNPs in presence of glutathione

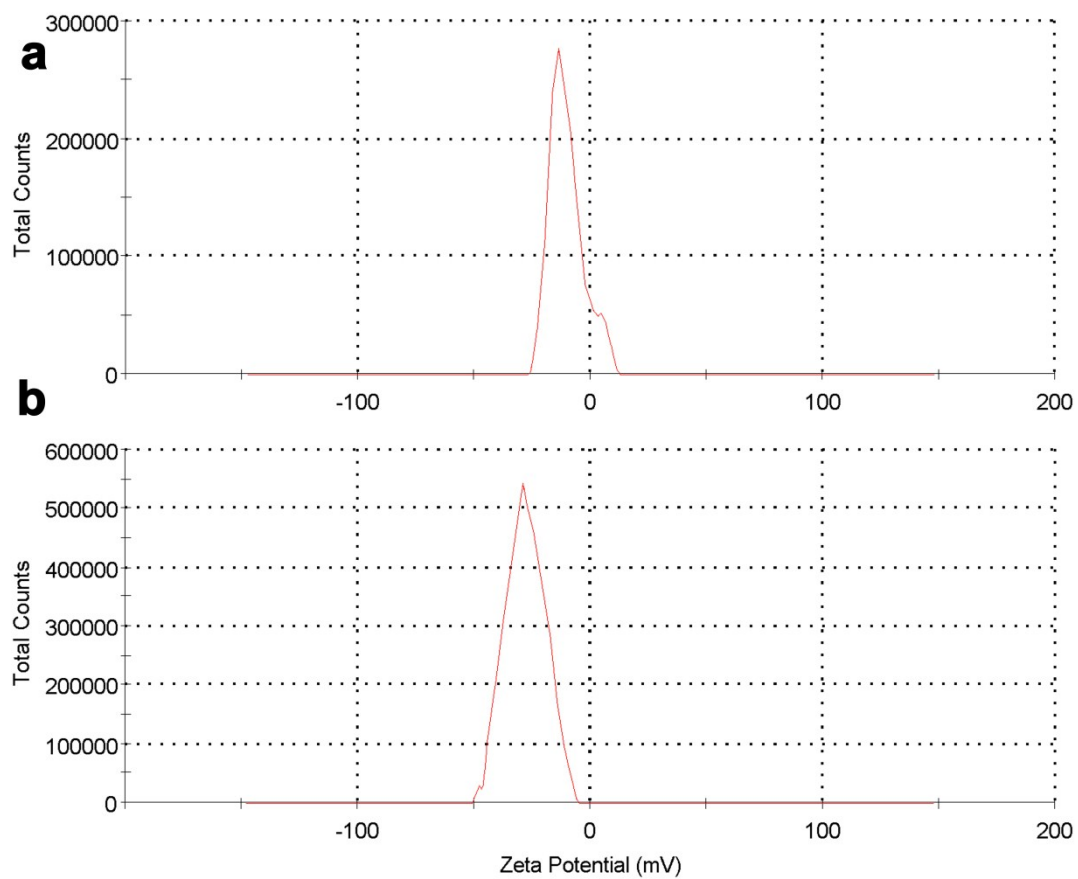

**Fig. S6** Zeta potential spectra of (a) MTT-AgNPs and (b) MTT-AgNPs in presence of glutathione
